# Supplementary material
Source: publisher figshare collection journal article supplement (https://gsapubs.figshare.com/articles/dataset/_/12348068)
Supplement: Supplementary file 1 [file 1]

| Abbrev | Spring Name                     | Table DR1-- Colorado Plateau Hydrochemistry |              |                 |               | Occurrence Rim |
|--------|---------------------------------|---------------------------------------------|--------------|-----------------|---------------|----------------|
|        |                                 | River Mile                                  | Aquifer Unit | Discharge (L/s) | Elevation (m) |                |
| BS     | Blue Spring                     | 61.4                                        | RM           | 2810.0          | 970           | S              |
| B      | Bridge                          |                                             |              | 2               |               | S              |
| Cl     | Clear Creek                     | 84                                          | RM           | 100.0           | 1561 & 1731   | N              |
| Co     | Columbine Creek                 | 274.3                                       | RM           | 9.7             | 479           | S              |
| Ct     | Cottonwood Spring               | 80.5                                        | RM           | 1.7             | 1210          | S              |
| Cr     | Crystal Creek (mouth)           | 98                                          |              | 42.5            |               | N              |
| De     | Deer Creek                      | 136.3                                       | RM           | 113.4           | 756 & 841     | N              |
| DiS    | Diamond Springs                 | 225                                         | RM           | 51.9            | 1110          | S              |
| F      | Fence Springs-L                 | 30.5                                        | RM           | 442.0           | 884           | S              |
| G      | Grapevine Spring                | 81.5                                        | RM           | 12.5            | 1110          | S              |
| Hn     | Hance Spring                    | 78.7                                        | RM           | 1.1             |               | S              |
| Hav    | Havasus Springs east            | 157                                         | RM           | 1838.3          | 993           | S              |
| Hv     | Havasus Springs below Hav falls | 157                                         | RM           | 282.0           | 808           | S              |
| He     | Hermit Springs                  | 95                                          | RM           | 21.9            | 915 & 1720    | S              |
| H      | Hindu                           |                                             |              | 8               | 1049          | S              |
| I      | Indian Gardens Springs          | 89                                          | RM           | 27.9            | 1155          | S              |
| K      | Kanab Creek (at mouth)          | 143.5                                       |              | 113.6           |               | N              |
| Kw     | Kwagunt Spring                  | 56                                          | T            | 15.0            | 1162          | N              |
| L      | Lava Warm Spring                | 178                                         | RM           | 189.3           | 518           | S              |
| Sa     | LCR- lower spring               | 61.4                                        | T            | 1               | 866           | S              |
| Sa     | LCR-Salt Spring                 | 61.4                                        | RM           | 3420.0          | 887           | S              |
| Ma     | Matkatamiba Spring              | 148                                         | RM           | 3.8             |               | S              |
| M      | Milkweed                        |                                             |              | 11              | 1439          | S              |
| Mh     | Mohawk Canyon Spring            | 171.3                                       | RM           | 1.6             | 701           | S              |
| Mn     | Monument Spring                 | 93.5                                        | T            | 7               |               | S              |
| Nn     | Nankoweap Spring                | 53                                          |              | 17.0            | 1830 & 1860   | N              |
| Na     | National Canyon Springs         | 166.4                                       | RM           | 5.1             |               | S              |
| O      | Olo Canyon                      | 145.5                                       | RM           | 1.6             |               | S              |
| Pe     | Peach Spring                    |                                             |              | 3               | 1280          | S              |
| Pi     | Pipe Creek                      | 89                                          | RM           | 1.1             | 1122          | S              |
| Q      | Quartermaster Spring            | 260                                         |              | 41.6            | 500           | S              |
| RS     | Roaring Spring                  | 88                                          | RM           | 160.6           | 1585          | N              |
| Ry     | Royal Arch/ Elves               | 116.5                                       | RM           | 14.1            | 927           | S              |
| S      | Shinumo Creek (mouth)           | 108.6                                       |              | 190.0           |               | N              |
| Sp     | Spencer                         |                                             |              | 109.0           |               | S              |
|        | Spencer Spring                  | 246                                         |              | 63              | 549           | S              |
| St     | Stone Spring                    | 131.7                                       |              | 1.3             | 1119          | N              |
| Su     | Surprise Canyon                 | 248.5                                       |              | 12.7            |               | N              |
| Th     | Three Springs                   | 215.5                                       |              | 9.7             | 457           | S              |
| TR     | Thunder River                   | 134                                         | RM           | 920.1           | 1037 & 1138   | N              |
| Tf     | Traverine Falls                 | 230.6                                       | T            | 5.7             | 512           | S              |
| Tg     | Travertine Grotto Spring        | 229                                         | T            | 57              | 659           | S              |
| V      | Vaseys Spring                   | 32                                          | RM           | 157.8           | 976           | N              |

Incision Animation (ppt)

Incision Animation (zip)

Table DR2. Incision rate constraints from Grand Canyon

| Incision point                    | Sample name                     | river mile downstream from Lees Ferry | age (Ma) | error (2s) | elevation of sample (m) | elev above river (m) | elev above side stream (s) (m) | distance from river (km) | incision rate (this paper) m/Ma | geologic interpretation of this paper                                                                                 |
|-----------------------------------|---------------------------------|---------------------------------------|----------|------------|-------------------------|----------------------|--------------------------------|--------------------------|---------------------------------|-----------------------------------------------------------------------------------------------------------------------|
| <b>Caves outside Grand Canyon</b> |                                 |                                       |          |            |                         |                      |                                |                          |                                 |                                                                                                                       |
| 4                                 | Grand Canyon Cavern             | na                                    | 16.96    | 0.83       | 1530-1630               | 1130-1230            |                                | 28.9                     | na                              | water table at 1286 m(409 m below surface), lowering of 244-346 m in 17 Ma (14-20 m/Ma) is not relatable to inc       |
| 1                                 | Grand Wash                      | na                                    | 7.55     | 0.34       |                         |                      |                                | 38.6                     | na                              | water table lowering not related to incision rates-- possibly related to 7 Ma faulting and volcanism in Shivwits Plat |
| <b>Eastern Grand Canyon</b>       |                                 |                                       |          |            |                         |                      |                                |                          |                                 |                                                                                                                       |
| 5                                 | Gavain Abyss                    | 93                                    | 2.19     | 0.47       |                         | 900                  |                                | 5.5                      |                                 | "surface mamillary", no geologic context, elevated sample, not considered reliable incision point                     |
| 6                                 | Tsean Bida                      | 80                                    | 3.43     | 0.43       | 1488                    | 726                  |                                | 4.6                      | 212                             | Horseshoe Mesa/ Cottonwood Creek possible incision rate                                                               |
| 7                                 | Butte Fault Cave Kwagunt Canyon | 57                                    | 2.68     | 0.49       | 1290                    | 445                  | 266                            | 2.6                      | 166/100                         | incision rate calculated relative to side stream is 100 m/Ma                                                          |
| 8                                 | Bedrock Canyon                  | 32                                    | 0.83     | 0.05       | 1188                    | 310                  | 150                            | 2.1                      | na                              | "surface mamillary", no geologic context, elevated sample, not considered reliable incision point                     |
| 9                                 | Shinumo Creek Cave              | 94                                    | 3.72     | 0.8        | 1590                    | 920                  | 600                            | 6.6                      | 247/160                         | incision rate calculated relative to sidestream is 160 m/Ma                                                           |
| 10                                | Mother Cave                     | 90                                    | 1.6      | 0.5        |                         | 605                  |                                | 2.2                      | na                              | elevated sample, not considered reliable                                                                              |
| A                                 | Kwagunt Travertines             | 57                                    | 0.385    | 0.01       |                         | 36                   |                                | 0                        | 150                             | incision rates 127-166 m/Ma depending on depth to bedrock, 172 based on strath to strath calculation                  |
| B                                 | 177- mile basalt                | 177                                   | 0.35     | 0.03       |                         | 32                   |                                | 0                        | 162                             | incision rates 123-171 m/Ma depending on depth to bedrock, 172 based on strath to strath calculation                  |
| <b>Western Grand Canyon</b>       |                                 |                                       |          |            |                         |                      |                                |                          |                                 |                                                                                                                       |
| 2                                 | cave B                          | 266                                   | 3.87     | 0.1        |                         | 290                  | na                             | 0.5                      | 75                              | cave in river corridor used as an incision point                                                                      |
| 3                                 | Dry Canyon                      | 265                                   | 2.17     | 0.34       |                         | 120                  | na                             | 1.6                      | 55                              | cave in river corridor used as an incision point                                                                      |
| C                                 | Granite Park basalts            | 208                                   | 0.61     | 0.01       |                         | 25                   |                                | 0                        | 76                              | assumes 20 m depth to bedrock; 55 m/Ma is based on strath to strath calculations (12)                                 |
| D                                 | Spencer Canyon basa             | 246                                   | 0.72     | 0.03       |                         | 30                   |                                | 0                        | 75                              | assumes 12 m depth to bedrock; 55 m/Ma is based on strath to strath calculations (12)                                 |
| <b>Lake Mead region</b>           |                                 |                                       |          |            |                         |                      |                                |                          |                                 |                                                                                                                       |
| E                                 | Sandy Point                     | 290                                   | 4.41     | 0.1        |                         | 105                  |                                | 0                        | 27                              | basalt overlies CR gravels 105 m above pre-Dam Colorado River lowered incision due to hangingwall flexure on Wheeler  |
| F                                 | Hualapi Limestone               | 320                                   | 5.97     | 0.07       | 700                     | 450                  |                                | 0                        | 75                              | river gravels overlie 6 Ma Hualapi Limestone at elevation of 700 m                                                    |

Incision Animation (ppt)

Incision Animation (zip)
